# Supplementary material
Source: PubMed Central journal article supplement (PMC5548598)
Supplement: NIHMS863048-supplement-2.pdf [file NIHMS863048-supplement-2.pdf]

**Supplementary Table 1. PCR primers and conditions.**

| <b>Vector</b>              | <b>Gene (allele)</b>           | <b>Primer A sequence</b>   | <b>Primer B sequence</b>    | <b>Product size (bp)</b> | <b>Annealing Temp (°C)</b> | <b>Extension Time</b> |
|----------------------------|--------------------------------|----------------------------|-----------------------------|--------------------------|----------------------------|-----------------------|
| <b>AAV-B2M-HyTK</b>        | <i>B2M</i> (-)                 | AGATCTCTGCCCCTCCCCATC      | ACCGTCTATATAAACCCGCAGT      | 2,657                    | 58                         | 2:45                  |
| <b>AAV-B2M-TKN</b>         | <i>B2M</i> (-)                 | AGATCTCTGCCCCTCCCCATC      | ACCGTCTATATAAACCCGCAGT      | 1,577                    | 58                         | 1:35                  |
| <b>AAV-B2M-Edimer</b>      | <i>B2M</i> (Edimer, [pre-Cre]) | CCTTCTATCGCCTTCTTGACGAGTTC | GTAGCTGCAGACAGTTCTCCAAACCC  | 1,291                    | 55                         | 1:30                  |
| <b>AAV-B2M-Edimer</b>      | <i>B2M</i> (Edimer)            | CAGGGGTCTGAGTCTCACAGCTTGT  | ACCACCTGCCTTTATCCTGCAATACC  | 379                      | 56                         | 2:00                  |
| <b>AAV-B2M-Etrimer</b>     | <i>B2M</i> (Etrimer)           | CGATTGCGAGCGCATCGCCTTCTATC | GAGAGGCAGAAGATAACCATAGTAGTT | 1,280                    | 55                         | 1:30                  |
| <b>DNA quality control</b> | <i>GAPDH</i>                   | GAAATCCCATCACCATCTTCCAG    | ATGAGTCCTTCCACGATACCAAAG    | 624                      | 59                         | 0:30                  |

**Supplementary Table 2. HLA types of ESCs, NK cells, and CD8+ T cells.**

|                                     | <b>HLA-A</b> | <b>HLA-B</b> | <b>HLA-C</b> | <b>HLA-E</b>  |
|-------------------------------------|--------------|--------------|--------------|---------------|
| Elf-1<br>ESCs                       | *11/*24      | *35/*55      | *03/*04      | *01:01/*01:01 |
| NK cell<br>donor 1                  | *01/*02      | *08/*35      | *04/*07      | *01:01/*01:01 |
| NK cell<br>donor 2                  | *02/*03      | *07/*40      | *07/*15      | *01:03/*01:03 |
| CD8 <sup>+</sup> T<br>cell<br>donor | *24/*30      | *13/*35      | *04/*06      | *01:01/*01:03 |
